# Supplementary material for: Method development, validation, and application for simultaneous determination of 56 new psychoactive substances in surface water by LC-MS/MS
Source: Research Square preprint supplement (doi:10.21203/rs.3.rs-2638358/v1), 2023-04-07
Supplement: Supplementary file 1 [file acc7b08859ef5ffc4c5f9d4e.docx]

**Method development and validation for simultaneous determination of 56 new psychoactive substances in surface water by LC-MS/MS**

Aslı Atasoy 1,, İsmail Ethem Gören2, Evsen Yavuz Guzel3, Nebile Daglioglu2,*

1Cukurova University, Institute of Addiction and Forensic Science, Adana, Turkey

2Cukurova University, School of Medicine Department of Forensic Medicine, Adana, Turkey

3Cukurova University, Faculty of Fisheries, Department of Basic Science, Adana, Turkey

**Table S1.** Optimized MRM transitions and retention times for all studied compounds.

| **N** | **Compounds** | **Drug categories** | **RT**  **(min)** | **Precursor ion**  **(m/z)** | **Product**  **ion-1**  **(m/z)** | **CE-1**  **(V)** | **Product**  **ion-2 (m/z)** | **CE-2**  **(V)** |
| --- | --- | --- | --- | --- | --- | --- | --- | --- |
| **1** | (S)-AB-FUBINACA | Synthetic Cannabinoid | 8.53 | 369.10 | 109.00 | -44 | 253.10 | -25 |
| **2** | 2,3 Ethylene isomer (HCl) | Synthetic Cathinone | 3.49 | 222.00 | 146.10 | -27 | 176.20 | -24 |
| **3** | 5-Methoxy MIPT | Tryptamine | 4.15 | 247.10 | 86.10 | -15 | 130.10 | -54 |
| **4** | 5F-ADBICA | Synthetic Cannabinoid | 8.86 | 362.10 | 232.10 | -22 | 144.00 | -45 |
| **5** | 5F-NPB-22 | Synthetic Cannabinoid | 9.26 | 378.00 | 145.00 | -41 | 213.10 | -26 |
| **6** | AB-CHIMINACA | Synthetic Cannabinoid | 9.12 | 357.30 | 241.10 | -27 | 312.20 | -18 |
| **7** | AB-CHIMINICA M1A | Synthetic Cannabinoid | 5.66 | 373.30 | 328.20 | -19 | 356.20 | -12 |
| **8** | AB-CHIMINICA M3A | Synthetic Cannabinoid | 6.33 | 374.30 | 145.10 | -39 | 257.10 | -22 |
| **9** | AB-FUBINACA-2A | Synthetic Cannabinoid | 6.44 | 399.20 | 109.00 | -47 | 253.10 | -25 |
| **10** | AB-FUBINACA-2B | Synthetic Cannabinoid | 6.45 | 399.00 | 109.00 | -54 | 252.90 | -30 |
| **11** | AB-PINACA | Synthetic Cannabinoid | 8.86 | 331.30 | 215.10 | -26 | 286.20 | -15 |
| **12** | AB-PINACA N-4-hydroxypentyl | Synthetic Cannabinoid | 7.42 | 347.10 | 213.10 | -30 | 302.10 | -16 |
| **13** | AB-PINACA Pentanoic acid | Synthetic Cannabinoid | 5.56 | 361.30 | 217.10 | -32 | 316.20 | -16 |
| **14** | AB-PINACA N-5-hydroxypentyl | Synthetic Cannabinoid | 7.42 | 347.20 | 213.00 | -38 | 301.90 | -14 |
| **15** | ADB-FUBINACA | Synthetic Cannabinoid | 8.90 | 383.30 | 109.00 | -50 | 253.10 | -28 |
| **16** | AKB-48-N-5-OH-Pentyl | Synthetic Cannabinoid | 9.68 | 382.30 | 135.10 | -23 | 79.20 | -56 |
| **17** | AKB-48-N (4-fluorobenzyl) | Synthetic Cannabinoid | 10.31 | 404.30 | 93.10 | -54 | 107.10 | -47 |
| **18** | AM-2201 | Synthetic Cannabinoid | 10.23 | 360.10 | 155.05 | -27 | 127.10 | -49 |
| **19** | AM-2201-6-OH-indol | Synthetic Cannabinoid | 9.38 | 376.10 | 155.05 | -26 | 127.05 | -49 |
| **20** | AM-2201-4-OH-Pentyl | Synthetic Cannabinoid | 9.35 | 376.10 | 127.05 | -49 | 155.10 | -26 |
| **21** | JWH-018 OH | Synthetic Cannabinoid | 7.92 | 358.20 | 155.10 | -20 | 127.10 | -35 |
| **22** | JWH-018-N-pentanoic acid | Synthetic Cannabinoid | 8.16 | 372.20 | 155.10 | -25 | 127.10 | -48 |
| **23** | JWH-073 | Synthetic Cannabinoid | 10.27 | 328.25 | 155.10 | -24 | 127.00 | -45 |
| **24** | JWH-073 OH | Synthetic Cannabinoid | 9.20 | 344.20 | 155.10 | -20 | 127.10 | -35 |
| **25** | JWH-073-N-(4-Hydroxybutyl) | Synthetic Cannabinoid | 9.27 | 344.00 | 155.00 | -24 | 127.00 | -48 |
| **26** | JWH-073-N-Butanoic acid | Synthetic Cannabinoid | 7.91 | 358.20 | 155.00 | -25 | 216.70 | -21 |
| **27** | JWH-081-4-OH-NAPHTYL | Synthetic Cannabinoid | 10.15 | 358.10 | 171.10 | -25 | 115.10 | -61 |
| **28** | JWH-081-N-5-OH-PENTYL | Synthetic Cannabinoid | 9.87 | 388.30 | 185.00 | -25 | 157.05 | -45 |
| **29** | JWH-122-4-OHP | Synthetic Cannabinoid | 9.83 | 372.10 | 169.10 | -24 | 141.10 | -45 |
| **30** | JWH-122-N-5-OH | Synthetic Cannabinoid | 9.79 | 372.10 | 169.05 | -22 | 141.15 | -43 |
| **31** | JWH-200 | Synthetic Cannabinoid | 9.72 | 385.30 | 155.10 | -23 | 114.10 | -29 |
| **32** | JWH-203 | Synthetic Cannabinoid | 10.28 | 340.20 | 125.00 | -29 | 214.15 | -25 |
| **33** | JWH-203-N-P-A | Synthetic Cannabinoid | 7.99 | 370.20 | 125.00 | -30 | 200.05 | -18 |
| **34** | JWH-210 | Synthetic Cannabinoid | 10.82 | 370.30 | 183.10 | -27 | 214.15 | -25 |
| **35** | JWH-210-5-OH-Pentyl | Synthetic Cannabinoid | 10.02 | 386.30 | 183.05 | -23 | 155.10 | -40 |
| **36** | JWH-210-5-OH-indol | Synthetic Cannabinoid | 10.02 | 386.30 | 183.05 | -29 | 230.10 | -26 |
| **37** | JWH-210-N-4OHP | Synthetic Cannabinoid | 9.98 | 386.30 | 183.15 | -26 | 155.10 | -40 |
| **38** | JWH-250 | Synthetic Cannabinoid | 10.20 | 336.10 | 121.15 | -21 | 91.15 | -43 |
| **39** | JWH-250-4-OH-Pentyl | Synthetic Cannabinoid | 9.05 | 352.10 | 121.10 | -23 | 91.05 | -46 |
| **40** | JWH-250-5-OHP | Synthetic Cannabinoid | 9.05 | 352.10 | 121.15 | -22 | 91.15 | -46 |
| **41** | MBDB. HCl | Synthetic Cathinone | 4.00 | 208.00 | 77.00 | -44 | 135.00 | -19 |
| **42** | RCS-4 | Synthetic Cannabinoid | 10.32 | 322.20 | 135.00 | -24 | 77.05 | -51 |
| **43** | RCS-4-5-0H-Pentyl | Synthetic Cannabinoid | 9.09 | 338.20 | 135.05 | -21 | 77.05 | -56 |
| **44** | RCS-4-N-5-Carboxypentyl | Synthetic Cannabinoid | 7.34 | 352.20 | 135.05 | -23 | 77.10 | -56 |
| **45** | UR-144-N-5-OH-Pentyl | Synthetic Cannabinoid | 9.76 | 328.30 | 125.15 | -20 | 55.20 | -38 |
| **46** | UR-144-NPA | Synthetic Cannabinoid | 8.79 | 342.30 | 125.15 | -22 | 55.10 | -46 |
| **47** | WIN-55212-2 | Synthetic Cannabinoid | 9.69 | 427.30 | 155.15 | -25 | 127.10 | -53 |
| **48** | XLR-11 | Synthetic Cannabinoid | 10.39 | 330.30 | 125.15 | -23 | 55.10 | -39 |
| **49** | XLR-11-6OH-indol | Synthetic Cannabinoid | 9.57 | 346.30 | 125.10 | -23 | 55.20 | -41 |
| **50** | XLR-11-N-4-OHP | Synthetic Cannabinoid | 9.28 | 346.30 | 248.10 | -22 | 144.00 | -34 |
| **51** | 1,4 ethylmetcathinone | Synthetic Cathinone | 4.43 | 192.10 | 145.05 | -17 | 144.15 | -29 |
| **52** | 4-methylmetcathinone | Synthetic Cathinone | 3.70 | 179.00 | 161.15 | -15 | 146.15 | -21 |
| **53** | Alpha-PVP | Synthetic Cathinone | 4.43 | 232.10 | 161.10 | -18 | 91.10 | -20 |
| **54** | Buphedrone | Synthetic Cathinone | 3.46 | 178.20 | 160.15 | -15 | 131.10 | -24 |
| **55** | Bupropion | Synthetic Cathinone | 4.80 | 241.00 | 185.05 | -13 | 132.10 | -30 |
| **56** | Methedrone | Synthetic Cathinone | 3.39 | 194.00 | 176.15 | -15 | 161.10 | -22 |
| **57** | JWH-073 d7 | Synthetic Cannabinoid IS | 10.27 | 335.30 | 127.10 | -47 | 155.05 | -26 |
| **58** | Mephedrone-d3 | Synthetic Cathinone IS | 3.78 | 181.20 | 163.15 | -15 | 148.15 | -22 |

***N:** Number, **CE:** Collusion Energy

**Table S2.** Intra-day and inter-day precision and accuracy values.

|  |  | **Intra-day** | | | | | | | | | | | | | | |
| --- | --- | --- | --- | --- | --- | --- | --- | --- | --- | --- | --- | --- | --- | --- | --- | --- |
|  | **Compounds** | **2.5 ng/L** | **cv** | **Bias** | **5 ng/L** | **cv** | **Bias** | **15 ng/L** | **cv** | **Bias** | **75 ng/L** | **cv** | **Bias** | **150 ng/L** | **cv** | **Bias** |
| **1** | (S)-AB-FUBINACA | n.d. | n.d. | n.d. | 114,21 | 14,35 | -4,77 | 102,81 | 13,72 | -9,39 | 86,19 | 3,99 | -9,33 | 94,59 | 5,89 | -1,22 |
| **2** | 2,3 Ethylone isomer (HCl) | n.d. | n.d. | n.d. | 80,12 | 9,07 | 10,15 | 89,71 | 12,53 | -10,73 | 100,46 | 4,41 | -5,22 | 87,86 | 6,40 | -8,60 |
| **3** | 5-Methoxy MIPT | 77,69 | 17,83 | 15,93 | 70,23 | 2,96 | -7,61 | 97,59 | 10,20 | -14,22 | 89,16 | 9,02 | -9,32 | 84,38 | 7,83 | -7,98 |
| **4** | 5F-ADBICA | 103,28 | 2,14 | 8,24 | 96,95 | 11,04 | -21,65 | 97,73 | 22,39 | -13,02 | 85,85 | 10,13 | -21,28 | 96,16 | 7,39 | -0,41 |
| **5** | 5F-NPB-22 | 89,67 | 16,34 | -9,45 | 97,84 | 6,92 | -14,35 | 94,69 | 6,02 | -14,83 | 93,77 | 4,93 | -8,41 | 91,32 | 5,35 | -9,18 |
| **6** | AB-CHIMINACA | n.d. | n.d. | n.d. | 88,21 | 5,03 | 6,71 | 98,23 | 13,76 | 0,56 | 98,72 | 2,26 | -10,33 | 95,32 | 3,98 | -8,19 |
| **7** | AB-CHIMINICA_M1A | n.d. | n.d. | n.d. | n.d. | n.d. | n.d. | 89,93 | 18,72 | -14,42 | 88,94 | 2,37 | -13,28 | 89,64 | 2,45 | -16,32 |
| **8** | AB-CHIMINICA_M3A | n.d. | n.d. | n.d. | n.d. | n.d. | n.d. | 97,98 | 9,96 | -13,30 | 100,01 | 19,13 | -6,52 | 96,34 | 12,06 | -2,76 |
| **9** | AB-FUBINACA-2A | n.d. | n.d. | n.d. | 97,17 | 0,96 | 22,49 | 109,03 | 3,03 | 9,76 | 96,99 | 3,24 | -0,39 | 99,94 | 9,74 | 1,65 |
| **10** | AB-FUBINICA_2B | n.d. | n.d. | n.d. | 92,14 | 5,74 | 30,33 | 107,17 | 2,14 | 25,01 | 93,89 | 3,99 | 4,18 | 106,40 | 5,73 | 5,40 |
| **11** | AB-PINACA | 103,26 | 22,34 | 10,74 | 98,73 | 12,46 | -7,81 | 97,69 | 16,30 | -3,83 | 94,12 | 4,58 | -11,16 | 111,00 | 2,73 | 6,22 |
| **12** | AB-PINACA N-4-hydroxypentyl | n.d. | n.d. | n.d. | 99,62 | 2,99 | 19,05 | 105,05 | 8,80 | 16,36 | 116,98 | 2,43 | 10,64 | 91,48 | 1,29 | 15,57 |
| **13** | AB-PINACA Pentanoic acid | n.d. | n.d. | n.d. | 90,19 | 1,08 | 18,90 | 86,75 | 0,95 | -18,39 | 100,21 | 16,75 | -4,47 | 103,40 | 12,18 | -5,12 |
| **14** | AB-PINACA_N-(5-hydroxypentyl) | n.d. | n.d. | n.d. | n.d. | n.d. | n.d. | 95,66 | 7,77 | 9,26 | 88,00 | 9,14 | -6,79 | 99,22 | 1,33 | 10,15 |
| **15** | ADB-FUBINACA | n.d. | n.d. | n.d. | 93,48 | 12,87 | 7,07 | 79,63 | 11,06 | -4,99 | 93,60 | 3,70 | -8,64 | 89,00 | 7,50 | -7,17 |
| **16** | AKB-48-N-5-OH-Pentyl | n.d. | n.d. | n.d. | 100,94 | 14,16 | 2,66 | 84,29 | 13,83 | -9,40 | 92,82 | 0,77 | -7,76 | 89,70 | 5,07 | -6,46 |
| **17** | AKB-48-N-PA | n.d. | n.d. | n.d. | n.d. | n.d. | n.d. | 90,11 | 3,38 | 5,76 | 89,73 | 2,03 | -8,80 | 91,76 | 4,43 | -0,08 |
| **18** | AM-2201 | n.d. | n.d. | n.d. | 98,18 | 2,11 | -5,33 | 80,76 | 21,95 | -8,95 | 97,40 | 3,42 | -1,89 | 93,37 | 2,79 | 6,49 |
| **19** | AM-2201-6-OH-indol | n.d. | n.d. | n.d. | n.d. | n.d. | n.d. | 106,77 | 4,20 | 11,97 | 100,93 | 0,97 | 2,73 | 89,19 | 1,07 | 5,68 |
| **20** | AM-2201-4-OH-Pentyl | n.d. | n.d. | n.d. | 89,87 | 2,21 | 28,75 | 94,90 | 9,40 | 11,98 | 84,84 | 8,97 | -8,08 | 94,93 | 10,26 | -3,23 |
| **21** | JWH-018 OH | n.d. | n.d. | n.d. | 94,90 | 1,16 | 22,60 | 86,07 | 12,06 | 8,43 | 102,34 | 4,02 | 11,57 | 98,39 | 4,80 | 5,32 |
| **22** | JWH-018-N-pentanoic acid | n.d. | n.d. | n.d. | 93,40 | 5,56 | 18,41 | 89,06 | 7,36 | -16,42 | 105,55 | 6,73 | 8,21 | 86,63 | 3,52 | -13,38 |
| **23** | JWH-073 | n.d. | n.d. | n.d. | 102,14 | 8,03 | 7,65 | 86,45 | 19,09 | -7,58 | 85,76 | 2,95 | -9,28 | 95,93 | 3,97 | -5,21 |
| **24** | JWH-073 OH | n.d. | n.d. | n.d. | 71,09 | 6,07 | -11,37 | 86,93 | 5,90 | -10,47 | 98,55 | 12,16 | -14,66 | 106,50 | 8,28 | -13,30 |
| **25** | JWH-073-N-(4-Hydroxybutyl) | n.d. | n.d. | n.d. | 79,15 | 1,58 | 4,53 | 91,78 | 9,93 | -6,93 | 91,64 | 5,94 | -8,56 | 105,64 | 5,26 | -1,15 |
| **26** | JWH-073-N-Butanoic acid | n.d. | n.d. | n.d. | 86,69 | 2,94 | 22,35 | 100,38 | 15,44 | 14,10 | 100,70 | 6,96 | 3,74 | 101,89 | 7,61 | 4,59 |
| **27** | JWH-081-4-OH-NAPHTYL | n.d. | n.d. | n.d. | n.d. | n.d. | n.d. | 101,15 | 4,31 | 12,05 | 88,02 | 8,53 | -8,19 | 106,68 | 2,99 | 7,61 |
| **28** | JWH-081-N-5-OH-PENTYL | n.d. | n.d. | n.d. | 93,38 | 2,65 | 11,85 | 84,33 | 9,29 | -10,51 | 95,22 | 3,29 | -13,66 | 97,39 | 9,46 | -8,28 |
| **29** | JWH-122-4-OHP | n.d. | n.d. | n.d. | 93,12 | 7,00 | 16,76 | 87,18 | 10,61 | 9,53 | 90,06 | 0,69 | -7,72 | 93,52 | 3,91 | -3,54 |
| **30** | JWH-122-N-5-OH | 89,03 | 13,52 | 15,24 | 76,78 | 7,24 | -10,49 | 81,34 | 3,19 | 6,42 | 87,63 | 2,75 | -10,28 | 100,63 | 10,49 | -3,41 |
| **31** | JWH-200 | 93,95 | 15,96 | 21,39 | 80,74 | 10,05 | -6,75 | 91,79 | 6,94 | -15,60 | 95,99 | 7,24 | -9,41 | 95,21 | 8,49 | -8,42 |
| **32** | JWH-203 | n.d. | n.d. | n.d. | n.d. | n.d. | n.d. | 95,64 | 3,49 | -2,70 | 92,12 | 6,05 | -7,70 | 102,75 | 14,96 | 1,70 |
| **33** | JWH-203-N-P-A | n.d. | n.d. | n.d. | n.d. | n.d. | n.d. | 88,40 | 9,82 | -7,47 | 93,23 | 0,89 | -9,94 | 83,19 | 1,60 | -9,23 |
| **34** | JWH-210 | n.d. | n.d. | n.d. | 85,17 | 11,21 | -12,78 | 81,73 | 8,72 | -14,10 | 86,29 | 3,17 | -12,39 | 84,15 | 21,21 | -13,53 |
| **35** | JWH-210-5-OH-Pentyl | n.d. | n.d. | n.d. | 89,57 | 1,49 | 23,51 | 86,81 | 11,07 | -1,40 | 87,53 | 2,48 | -6,21 | 96,12 | 5,07 | -11,33 |
| **36** | JWH-210-5-OH-indol | n.d. | n.d. | n.d. | 99,51 | 1,19 | 23,03 | 84,45 | 17,76 | -5,46 | 98,85 | 5,55 | 2,13 | 90,50 | 3,11 | 0,49 |
| **37** | JWH-210-N-4OHP | n.d. | n.d. | n.d. | 86,93 | 1,68 | 22,65 | 82,86 | 11,77 | -8,58 | 84,93 | 5,95 | -11,17 | 92,41 | 5,77 | 2,28 |
| **38** | JWH-250 | n.d. | n.d. | n.d. | 88,77 | 2,05 | 18,01 | 95,34 | 12,67 | 4,75 | 93,70 | 4,34 | -1,61 | 96,47 | 8,96 | 1,80 |
| **39** | JWH-250-4-OH-Pentyl | n.d. | n.d. | n.d. | 93,14 | 3,82 | 18,09 | 107,13 | 8,74 | 5,97 | 98,11 | 10,28 | -4,79 | 98,50 | 6,83 | -4,75 |
| **40** | JWH-250-5-OHP | n.d. | n.d. | n.d. | 92,80 | 1,26 | 23,30 | 97,22 | 9,76 | 12,44 | 96,05 | 1,06 | -12,42 | 85,86 | 5,62 | -5,45 |
| **41** | MBDB.HCl | 84,03 | 10,32 | 5,71 | 82,22 | 8,13 | -3,42 | 94,14 | 3,56 | -1,50 | 98,24 | 4,98 | -0,31 | 97,76 | 0,75 | -3,21 |
| **42** | RCS-4 | 86,79 | 8,02 | 8,11 | 90,06 | 6,62 | -6,93 | 90,01 | 9,31 | -5,84 | 85,29 | 2,55 | -8,59 | 89,82 | 1,60 | 10,88 |
| **43** | RCS-4-5-0H-Pentyl | n.d. | n.d. | n.d. | 88,99 | 4,67 | 10,94 | 85,50 | 14,75 | -13,00 | 89,51 | 3,70 | -11,10 | 83,12 | 2,27 | -12,03 |
| **44** | RCS-4-N-5-Carboxypentyl | n.d. | n.d. | n.d. | 83,74 | 4,57 | 17,25 | 87,35 | 9,51 | -14,57 | 81,72 | 0,84 | -16,11 | 86,69 | 6,97 | -10,95 |
| **45** | UR-144-N-5-OH-Pentyl | n.d. | n.d. | n.d. | 74,07 | 4,71 | 14,29 | 88,28 | 4,18 | -13,27 | 93,66 | 3,46 | -12,72 | 100,78 | 10,75 | -9,24 |
| **46** | UR-144-NPA | n.d. | n.d. | n.d. | 87,42 | 6,12 | -5,13 | 82,10 | 8,41 | -12,26 | 101,56 | 1,55 | 7,04 | 101,34 | 3,74 | 12,04 |
| **47** | WIN-55212-2 | n.d. | n.d. | n.d. | 89,49 | 6,54 | 16,07 | 95,55 | 1,11 | 5,56 | 95,05 | 5,31 | -7,34 | 92,20 | 6,43 | -5,48 |
| **48** | XLR-11 | n.d. | n.d. | n.d. | n.d. | n.d. | n.d. | 105,48 | 11,10 | 3,30 | 90,21 | 2,58 | -11,61 | 97,57 | 11,02 | -2,53 |
| **49** | XLR-11-6OH-indol | n.d. | n.d. | n.d. | n.d. | n.d. | n.d. | 92,31 | 9,91 | 6,53 | 81,96 | 5,66 | -13,75 | 84,45 | 5,29 | -3,12 |
| **50** | XLR-11-N-4-OHP | n.d. | n.d. | n.d. | 105,84 | 4,48 | 23,20 | 108,93 | 17,39 | -1,62 | 108,74 | 14,10 | -5,69 | 95,98 | 1,77 | -6,27 |
| **51** | 1,4 ethylmetcathinone | 111,32 | 15,50 | -0,64 | 79,02 | 2,24 | -7,17 | 86,43 | 3,64 | -0,70 | 84,36 | 3,63 | -1,40 | 87,99 | 1,51 | 4,26 |
| **52** | 4-methylmetcathinone | n.d. | n.d. | n.d. | 100,82 | 3,03 | 24,50 | 99,77 | 4,23 | 3,35 | 90,19 | 2,42 | -8,02 | 92,84 | 1,24 | -3,22 |
| **53** | alfaPVP | 92,95 | 11,07 | 5,87 | 81,43 | 8,49 | -4,25 | 84,64 | 5,20 | -11,59 | 100,43 | 4,87 | -7,89 | 99,86 | 5,28 | -2,71 |
| **54** | Buphedrone | 85,26 | 5,81 | -2,56 | 84,50 | 6,14 | 0,09 | 98,81 | 6,36 | 0,23 | 98,47 | 3,12 | -1,89 | 103,83 | 1,47 | 2,67 |
| **55** | bupropion | 104,09 | 14,23 | 15,15 | 76,97 | 5,24 | -7,33 | 97,00 | 5,71 | 0,70 | 93,27 | 3,52 | -4,38 | 86,77 | 8,97 | -5,57 |
| **56** | methedrone | 83,59 | 8,09 | 8,75 | 84,17 | 4,23 | -10,54 | 87,81 | 2,76 | -9,07 | 95,49 | 6,79 | -5,04 | 93,61 | 0,86 | -4,62 |
|  |  | **Inter-day** | | | | | | | | | | | | | | |
|  | **Compounds** | **2.5 ng/L** | **cv** | **Bias** | **5 ng/L** | **cv** | **Bias** | **15 ng/L** | **cv** | **Bias** | **75 ng/L** | **cv** | **Bias** | **150 ng/L** | **cv** | **Bias** |
| **1** | (S)-AB-FUBINACA | n.d. | n.d. | n.d. | 113,46 | 8,73 | -5,40 | 103,69 | 10,19 | -8,61 | 87,20 | 3,73 | -8,26 | 92,42 | 3,74 | -3,49 |
| **2** | 2,3 Ethylone isomer (HCl) | n.d. | n.d. | n.d. | 78,39 | 6,90 | 7,77 | 83,66 | 8,60 | -16,74 | 102,07 | 3,52 | -3,70 | 87,25 | 4,65 | -9,23 |
| **3** | 5-Methoxy MIPT | 82,18 | 9,30 | 22,63 | 75,50 | 2,01 | -6,71 | 93,37 | 7,29 | -17,94 | 90,32 | 6,97 | -8,14 | 83,20 | 5,86 | -9,26 |
| **4** | 5F-ADBICA | 103,00 | 1,81 | 7,94 | 96,11 | 7,62 | -22,34 | 100,69 | 16,25 | -10,38 | 87,34 | 6,31 | -19,91 | 96,99 | 4,71 | 0,45 |
| **5** | 5F-NPB-22 | 87,56 | 12,17 | -11,58 | 97,71 | 5,34 | -14,47 | 97,33 | 3,82 | -12,46 | 94,48 | 3,51 | -7,72 | 91,49 | 3,13 | -9,01 |
| **6** | AB-CHIMINACA | n.d. | n.d. | n.d. | 105,89 | 3,99 | 8,58 | 95,08 | 10,28 | -2,67 | 98,70 | 1,72 | -10,34 | 94,91 | 2,95 | -8,59 |
| **7** | AB-CHIMINICA_M1A | n.d. | n.d. | n.d. | n.d. | n.d. | n.d. | 96,35 | 12,24 | -8,32 | 89,93 | 1,65 | -12,31 | 89,45 | 1,64 | -16,50 |
| **8** | AB-CHIMINICA_M3A | n.d. | n.d. | n.d. | n.d. | n.d. | n.d. | 91,77 | 8,74 | -17,52 | 88,51 | 13,28 | 2,09 | 97,81 | 4,32 | -7,17 |
| **9** | AB-FUBINACA-2A | n.d. | n.d. | n.d. | 95,88 | 0,65 | 22,50 | 108,17 | 1,97 | 8,89 | 95,51 | 2,39 | -1,91 | 102,91 | 6,32 | 4,67 |
| **10** | AB-FUBINICA_2B | n.d. | n.d. | n.d. | 87,48 | 0,43 | 23,73 | 102,13 | 3,18 | 19,13 | 92,42 | 3,53 | 2,55 | 108,29 | 3,64 | 7,27 |
| **11** | AB-PINACA | 100,99 | 14,42 | 8,30 | 101,05 | 6,86 | -5,64 | 100,02 | 11,05 | -1,54 | 94,48 | 2,67 | -10,82 | 107,55 | 2,10 | 2,91 |
| **12** | AB-PINACA N-4-hydroxypentyl | n.d. | n.d. | n.d. | 98,68 | 1,94 | 17,93 | 104,51 | 7,52 | 15,76 | 116,25 | 1,87 | 9,95 | 91,59 | 0,96 | 15,71 |
| **13** | AB-PINACA Pentanoic acid | n.d. | n.d. | n.d. | 90,17 | 0,77 | 18,88 | 86,77 | 0,65 | -18,37 | 98,01 | 11,47 | -6,57 | 109,33 | 8,43 | 0,32 |
| **14** | AB-PINACA_N-(5-hydroxypentyl) | n.d. | n.d. | n.d. | n.d. | n.d. | n.d. | 95,34 | 6,56 | 8,90 | 87,45 | 6,27 | -7,37 | 98,52 | 0,63 | 9,38 |
| **15** | ADB-FUBINACA | n.d. | n.d. | n.d. | 100,72 | 10,46 | 15,37 | 73,32 | 8,16 | -12,51 | 93,78 | 2,92 | -8,47 | 89,40 | 5,39 | -6,75 |
| **16** | AKB-48-N-5-OH-Pentyl | n.d. | n.d. | n.d. | 95,34 | 9,79 | -3,04 | 85,66 | 9,05 | -7,94 | 92,31 | 0,70 | -8,27 | 91,29 | 3,73 | -4,80 |
| **17** | AKB-48-N-PA | n.d. | n.d. | n.d. | n.d. | n.d. | n.d. | 90,67 | 2,39 | 6,42 | 89,97 | 1,50 | -8,55 | 90,45 | 2,97 | -1,51 |
| **18** | AM-2201 | n.d. | n.d. | n.d. | 97,56 | 1,55 | -5,93 | 87,09 | 8,71 | -10,52 | 97,18 | 2,15 | -2,11 | 94,70 | 2,23 | 8,00 |
| **19** | AM-2201-6-OH-indol | n.d. | n.d. | n.d. | n.d. | n.d. | n.d. | 105,05 | 3,03 | 10,17 | 101,26 | 0,62 | 3,06 | 89,60 | 0,71 | 6,17 |
| **20** | AM-2201-4-OH-Pentyl | n.d. | n.d. | n.d. | 93,84 | 1,66 | 25,06 | 95,63 | 6,60 | 12,84 | 84,14 | 5,21 | -8,83 | 95,76 | 6,36 | -2,39 |
| **21** | JWH-018 OH | n.d. | n.d. | n.d. | 94,45 | 0,92 | 22,03 | 88,36 | 8,81 | 11,32 | 101,16 | 3,38 | 10,28 | 98,56 | 3,54 | 5,50 |
| **22** | JWH-018-N-pentanoic acid | n.d. | n.d. | n.d. | 93,42 | 3,83 | 18,44 | 92,06 | 4,86 | -13,60 | 106,43 | 4,59 | 9,11 | 85,68 | 2,73 | -14,33 |
| **23** | JWH-073 | n.d. | n.d. | n.d. | 103,15 | 5,44 | 8,71 | 79,72 | 13,25 | -14,78 | 86,31 | 2,01 | -8,70 | 93,82 | 3,05 | -7,30 |
| **24** | JWH-073 OH | 92,25 | 14,99 | 22,74 | 69,31 | 3,94 | -13,59 | 88,97 | 3,94 | -8,36 | 102,17 | 7,81 | -11,53 | 105,62 | 5,56 | -14,30 |
| **25** | JWH-073-N-(4-Hydroxybutyl) | n.d. | n.d. | n.d. | 79,61 | 1,17 | 5,13 | 97,04 | 7,52 | -1,59 | 92,28 | 4,94 | -7,92 | 103,62 | 3,69 | -3,05 |
| **26** | JWH-073-N-Butanoic acid | n.d. | n.d. | n.d. | 86,39 | 1,91 | 21,93 | 101,63 | 9,83 | 15,52 | 99,79 | 4,37 | 2,80 | 104,98 | 5,01 | 7,76 |
| **27** | JWH-081-4-OH-NAPHTYL | n.d. | n.d. | n.d. | n.d. | n.d. | n.d. | 102,11 | 2,61 | 13,12 | 86,03 | 6,22 | -10,26 | 106,85 | 2,10 | 7,78 |
| **28** | JWH-081-N-5-OH-PENTYL | n.d. | n.d. | n.d. | 93,38 | 2,30 | 11,85 | 88,02 | 7,07 | -6,59 | 95,00 | 2,45 | -13,86 | 97,37 | 6,59 | -8,30 |
| **29** | JWH-122-4-OHP | n.d. | n.d. | n.d. | 92,06 | 4,76 | 15,42 | 82,23 | 7,34 | 3,32 | 89,88 | 0,44 | -7,91 | 94,54 | 2,63 | -2,49 |
| **30** | JWH-122-N-5-OH | 90,45 | 8,06 | 17,08 | 78,33 | 4,41 | -8,70 | 81,34 | 2,08 | 6,41 | 88,00 | 2,14 | -9,91 | 100,51 | 9,10 | -3,53 |
| **31** | JWH-200 | 94,82 | 11,06 | 22,50 | 79,83 | 7,27 | -7,81 | 90,94 | 5,21 | -16,38 | 99,69 | 6,50 | -5,91 | 96,81 | 5,57 | -6,88 |
| **32** | JWH-203 | n.d. | n.d. | n.d. | n.d. | n.d. | n.d. | 95,18 | 2,77 | -3,16 | 94,18 | 4,57 | -5,64 | 105,33 | 1,51 | 4,25 |
| **33** | JWH-203-N-P-A | n.d. | n.d. | n.d. | n.d. | n.d. | n.d. | 91,38 | 8,20 | -4,35 | 93,70 | 0,79 | -9,48 | 83,71 | 1,00 | -8,66 |
| **34** | JWH-210 | n.d. | n.d. | n.d. | 83,94 | 6,79 | -14,04 | 81,15 | 5,87 | -14,71 | 87,92 | 2,39 | -10,73 | 88,13 | 13,78 | -9,44 |
| **35** | JWH-210-5-OH-Pentyl | n.d. | n.d. | n.d. | 88,99 | 1,28 | 22,71 | 84,91 | 7,05 | -3,56 | 88,40 | 1,57 | -5,28 | 96,98 | 4,07 | -10,54 |
| **36** | JWH-210-5-OH-indol | n.d. | n.d. | n.d. | 99,58 | 0,75 | 23,12 | 81,79 | 10,87 | -8,43 | 100,09 | 3,51 | 3,41 | 91,41 | 2,56 | 1,50 |
| **37** | JWH-210-N-4OHP | n.d. | n.d. | n.d. | 86,21 | 1,09 | 21,62 | 77,76 | 8,03 | -14,21 | 82,71 | 4,00 | -13,49 | 91,77 | 3,44 | 1,57 |
| **38** | JWH-250 | n.d. | n.d. | n.d. | 89,32 | 1,31 | 18,73 | 98,14 | 8,99 | 7,83 | 92,59 | 3,30 | -2,78 | 97,47 | 7,16 | 2,86 |
| **39** | JWH-250-4-OH-Pentyl | n.d. | n.d. | n.d. | 93,85 | 2,82 | 18,99 | 109,99 | 7,09 | 8,80 | 92,83 | 7,12 | -9,91 | 98,75 | 3,99 | -4,52 |
| **40** | JWH-250-5-OHP | n.d. | n.d. | n.d. | 92,41 | 0,92 | 22,78 | 96,10 | 6,78 | 11,14 | 96,20 | 0,62 | -12,28 | 84,70 | 3,55 | -6,73 |
| **41** | MBDB.HCl | 79,19 | 6,62 | -0,38 | 85,59 | 5,43 | 0,53 | 94,70 | 2,68 | -0,92 | 98,16 | 3,56 | -0,39 | 97,84 | 0,52 | -3,13 |
| **42** | RCS-4 | 87,68 | 5,12 | 9,22 | 92,54 | 4,35 | -4,36 | 90,44 | 5,91 | -5,39 | 84,42 | 1,66 | -9,53 | 90,16 | 0,97 | 11,31 |
| **43** | RCS-4-5-0H-Pentyl | n.d. | n.d. | n.d. | 88,82 | 2,81 | 10,74 | 84,78 | 10,20 | -13,74 | 88,30 | 2,31 | -12,31 | 83,61 | 1,43 | -11,51 |
| **44** | RCS-4-N-5-Carboxypentyl | n.d. | n.d. | n.d. | 83,42 | 2,99 | 16,80 | 81,64 | 6,92 | -20,16 | 81,93 | 0,54 | -15,90 | 84,57 | 4,37 | -13,12 |
| **45** | UR-144-N-5-OH-Pentyl | n.d. | n.d. | n.d. | 74,06 | 2,61 | 14,28 | 88,90 | 3,00 | -12,66 | 94,59 | 2,53 | -11,85 | 105,67 | 7,12 | -4,83 |
| **46** | UR-144-NPA | n.d. | n.d. | n.d. | 87,84 | 3,81 | -4,67 | 87,77 | 6,36 | -6,20 | 101,09 | 0,98 | 6,55 | 99,50 | 2,68 | 10,00 |
| **47** | WIN-55212-2 | n.d. | n.d. | n.d. | 88,91 | 4,53 | 15,31 | 95,81 | 0,69 | 5,84 | 94,36 | 4,28 | -8,02 | 92,40 | 4,41 | -5,27 |
| **48** | XLR-11 | n.d. | n.d. | n.d. | n.d. | n.d. | n.d. | 102,47 | 6,81 | 0,35 | 89,23 | 1,67 | -12,56 | 97,06 | 7,40 | -3,04 |
| **49** | XLR-11-6OH-indol | n.d. | n.d. | n.d. | n.d. | n.d. | n.d. | 95,52 | 9,12 | 10,23 | 82,96 | 3,50 | -12,70 | 84,61 | 4,50 | -2,94 |
| **50** | XLR-11-N-4-OHP | n.d. | n.d. | n.d. | 105,29 | 3,36 | 22,56 | 105,76 | 13,01 | -4,48 | 105,62 | 10,08 | -8,39 | 95,64 | 1,28 | -6,59 |
| **51** | 1,4 ethylmetcathinone | 111,09 | 12,56 | -0,84 | 78,84 | 1,49 | -7,38 | 86,47 | 2,19 | -0,65 | 84,00 | 2,66 | -1,82 | 87,55 | 1,21 | 3,75 |
| **52** | 4-methylmetcathinone | n.d. | n.d. | n.d. | 99,55 | 2,29 | 22,93 | 100,42 | 2,49 | 4,03 | 90,69 | 1,61 | -7,51 | 93,56 | 0,91 | -2,47 |
| **53** | alfaPVP | 94,49 | 6,93 | 7,63 | 84,80 | 7,10 | -0,30 | 83,72 | 4,09 | -12,56 | 100,72 | 3,30 | -7,61 | 98,13 | 3,75 | -4,39 |
| **54** | Buphedrone | 84,46 | 3,14 | -3,48 | 84,69 | 4,79 | 0,33 | 98,26 | 4,79 | -0,33 | 99,49 | 1,99 | -0,87 | 103,75 | 1,07 | 2,59 |
| **55** | bupropion | 104,79 | 9,89 | 15,92 | 77,52 | 3,23 | -6,67 | 98,28 | 3,78 | 2,03 | 92,82 | 2,42 | -4,85 | 87,00 | 6,34 | -5,32 |
| **56** | methedrone | 84,53 | 4,05 | 9,97 | 84,39 | 3,29 | -10,30 | 87,72 | 2,23 | -9,16 | 94,32 | 3,72 | -6,21 | 93,76 | 0,63 | -4,46 |

**Table S3.** Stability values (%) determined for different pH, temperature values and time series for 56 NPS

| **Compounds** | Residual percentage (%) | | | | | | | | | | | | | | | | | |
| --- | --- | --- | --- | --- | --- | --- | --- | --- | --- | --- | --- | --- | --- | --- | --- | --- | --- | --- |
| pH 2 | | | | | | | | | pH 7 | | | | | | | | |
| (+) 4 ºC | | | (+) 20 ºC | | | (-) 20 ºC | | | (+) 4 ºC | | | (+) 20 ºC | | | (-) 20 ºC | | |
| 24h | 72h | 7days | 24h | 72h | 7days | 24h | 72h | 7days | 24h | 72h | 7days | 24h | 72h | 7days | 24h | 72h | 7days |
| (S)-AB-FUBINACA | 90,84 | 80,89 | 68,25 | 96,64 | 101,12 | 36,38 | 135,78 | 95,51 | 94,51 | 125,63 | 93,44 | 76,39 | 73,74 | 103,39 | 10,26 | 80,57 | 98,45 | 94,19 |
| 2,3 Ethylene isomer (HCl) | 108,43 | 85,56 | 81,14 | 85,77 | 60,82 | 53,73 | 117,82 | 106,54 | 90,02 | 107,61 | 88,42 | 78,13 | 124,59 | 82,54 | 42,11 | 102,33 | 124,54 | 88,52 |
| 5-Methoxy MIPT | 105,99 | 96,35 | 82,01 | 129,32 | 104,08 | 61,04 | 86,38 | 75,69 | 85,34 | 103,64 | 94,28 | 51,27 | 147,81 | 87,22 | 55,66 | 112,17 | 91,23 | 80,21 |
| 5F-ADBICA | 90,65 | 54,77 | 5,85 | 57,37 | 7,14 | 2,61 | 183,25 | 55,61 | 5,96 | 93,16 | 56,70 | 42,22 | 172,75 | 84,08 | 30,86 | 149,67 | 66,11 | 4,91 |
| 5F-NPB-22 | 100,75 | 108,95 | 29,29 | 107,35 | 115,02 | 103,47 | 117,71 | 112,87 | 103,02 | 80,38 | 84,47 | 60,60 | 161,08 | 95,29 | 44,12 | 150,47 | 89,16 | 68,67 |
| AB-CHIMINACA | 80,22 | 100,47 | 8,53 | 106,33 | 90,41 | 7,29 | 95,29 | 101,34 | 52,60 | 81,30 | 97,59 | 19,60 | 97,12 | 101,12 | 9,28 | 95,66 | 93,39 | 32,53 |
| AB-CHIMINICA M1A | 92,60 | 44,88 | 8,52 | 101,02 | 51,50 | 26,91 | 92,81 | 40,24 | 20,10 | 119,52 | 43,49 | 5,73 | 80,99 | 37,34 | 14,31 | 61,15 | 48,25 | 19,08 |
| AB-CHIMINICA M3A | 109,73 | 56,17 | 30,57 | 74,20 | 69,00 | 26,01 | 92,48 | 72,56 | 39,02 | 78,71 | 48,20 | 45,53 | 70,89 | 66,36 | 16,90 | 69,82 | 68,13 | 69,60 |
| AB-FUBINACA-2A | 99,61 | 130,28 | 191,38 | 81,86 | 79,72 | 40,21 | 95,67 | 101,15 | 154,74 | 99,02 | 101,78 | 116,61 | 96,69 | 77,02 | 178,79 | 96,05 | 90,11 | 83,42 |
| AB-FUBINACA-2B | 118,59 | 97,39 | 204,50 | 100,21 | 95,25 | 54,15 | 95,72 | 115,96 | 167,59 | 116,11 | 114,29 | 108,90 | 71,25 | 91,81 | 110,31 | 93,77 | 89,93 | 104,35 |
| AB-PINACA | 95,86 | 67,50 | 51,89 | 78,88 | 75,26 | 58,88 | 88,44 | 73,24 | 65,26 | 186,63 | 68,64 | 54,27 | 60,25 | 57,40 | 30,38 | 72,12 | 67,51 | 49,41 |
| AB-PINACA N-4-hydroxypentyl | 74,75 | 77,05 | 62,53 | 68,71 | 51,66 | 9,46 | 69,03 | 65,50 | 41,59 | 87,74 | 45,26 | 35,31 | 77,79 | 28,38 | 16,51 | 85,16 | 69,45 | 34,64 |
| AB-PINACA Pentanoic acid | 115,09 | 92,85 | 7,57 | 72,21 | 135,26 | 0,00 | 115,48 | 89,99 | 25,04 | 121,32 | 78,96 | 22,08 | 72,22 | 65,94 | 6,20 | 83,32 | 80,85 | 30,99 |
| AB-PINACA N-5-hydroxypentyl | 76,44 | 54,02 | 32,54 | 65,39 | 30,38 | 13,08 | 67,06 | 29,21 | 32,24 | 63,77 | 39,24 | 18,14 | 66,22 | 33,33 | 18,56 | 69,64 | 49,70 | 31,63 |
| ADB-FUBINACA | 94,38 | 83,64 | 28,34 | 83,25 | 58,32 | 13,11 | 92,51 | 84,93 | 65,86 | 81,03 | 60,92 | 47,09 | 60,92 | 41,19 | 3,67 | 100,53 | 65,52 | 65,15 |
| AKB-48-N-5-OH-Pentyl | 114,58 | 82,22 | 177,12 | 173,39 | 86,16 | 48,03 | 90,00 | 79,25 | 52,36 | 148,15 | 63,99 | 60,37 | 169,08 | 80,76 | 32,76 | 94,08 | 92,40 | 46,54 |
| AKB-48-N (4-fluorobenzyl) | 122,41 | 52,11 | 33,37 | 101,36 | 27,90 | 12,23 | 116,34 | 82,37 | 63,08 | 109,00 | 11,52 | 23,19 | 89,44 | 33,13 | 12,09 | 95,97 | 75,26 | 58,25 |
| AM-2201 | 85,25 | 46,32 | 37,80 | 82,99 | 43,52 | 6,73 | 106,40 | 53,95 | 21,81 | 90,00 | 42,75 | 9,25 | 74,98 | 40,01 | 6,56 | 90,37 | 40,67 | 26,20 |
| AM-2201-6-OH-indol | 87,71 | 69,89 | 58,32 | 84,53 | 49,46 | 46,00 | 98,64 | 95,40 | 77,25 | 75,03 | 52,74 | 35,15 | 67,62 | 56,52 | 30,92 | 83,96 | 57,12 | 55,83 |
| AM-2201-4-OH-Pentyl | 93,21 | 81,84 | 43,95 | 73,54 | 68,57 | 38,63 | 108,69 | 96,91 | 62,47 | 96,30 | 77,58 | 28,04 | 93,92 | 90,83 | 61,01 | 90,75 | 90,44 | 62,21 |
| JWH-018 OH | 98,34 | 83,12 | 46,11 | 89,37 | 65,93 | 19,31 | 97,52 | 95,87 | 76,88 | 95,31 | 85,87 | 56,22 | 70,50 | 55,92 | 26,39 | 106,55 | 90,17 | 78,77 |
| JWH-073-N-(4-Hydroxybutyl) | 92,37 | 81,94 | 63,53 | 94,63 | 89,16 | 46,87 | 106,95 | 105,86 | 47,95 | 97,95 | 80,35 | 25,62 | 98,14 | 89,34 | 13,26 | 98,58 | 94,54 | 69,76 |
| JWH-073-N-Butanoic acid | 90,62 | 55,32 | 15,33 | 92,22 | 41,66 | 12,98 | 81,53 | 67,25 | 58,03 | 103,98 | 41,16 | 35,83 | 98,72 | 40,25 | 27,44 | 117,40 | 45,35 | 31,64 |
| JWH-081-4-OH-NAPHTYL | 90,40 | 77,94 | 57,04 | 90,41 | 69,20 | 54,11 | 99,96 | 77,63 | 69,80 | 151,06 | 73,27 | 33,42 | 180,69 | 41,56 | 13,07 | 81,49 | 74,44 | 40,73 |
| JWH-081-N-5-OH-PENTYL | 83,49 | 87,83 | 62,06 | 91,09 | 73,65 | 53,56 | 97,86 | 92,07 | 78,00 | 137,83 | 104,20 | 35,21 | 111,61 | 53,72 | 25,21 | 90,46 | 86,89 | 57,16 |
| JWH-122-4-OHP | 102,74 | 84,56 | 70,25 | 106,45 | 102,40 | 56,99 | 94,46 | 94,28 | 89,67 | 100,80 | 94,16 | 77,71 | 84,89 | 81,12 | 67,58 | 97,06 | 96,67 | 78,49 |
| JWH-122-N-5-OH | 112,66 | 93,42 | 93,57 | 132,35 | 83,78 | 61,86 | 107,27 | 100,20 | 104,79 | 115,54 | 89,37 | 78,55 | 119,96 | 83,86 | 73,32 | 104,07 | 92,42 | 90,56 |
| JWH-200 | 118,00 | 91,16 | 74,80 | 101,47 | 67,96 | 52,60 | 100,23 | 92,84 | 78,51 | 74,06 | 68,55 | 54,99 | 74,09 | 62,13 | 47,03 | 78,58 | 65,30 | 56,83 |
| JWH-203 | 82,01 | 80,27 | 76,17 | 50,87 | 42,22 | 22,10 | 93,86 | 89,65 | 79,12 | 72,80 | 69,29 | 44,17 | 48,96 | 42,22 | 16,27 | 83,06 | 72,66 | 65,25 |
| JWH-203-N-P-A | 112,74 | 76,93 | 64,24 | 72,73 | 58,62 | 39,13 | 77,78 | 74,48 | 68,25 | 74,54 | 60,75 | 57,22 | 64,45 | 63,74 | 51,16 | 81,67 | 79,26 | 61,06 |
| JWH-210 | 95,15 | 85,17 | 71,70 | 118,49 | 60,85 | 3,67 | 102,34 | 95,04 | 84,25 | 120,73 | 105,66 | 61,83 | 76,66 | 73,84 | 0,00 | 116,42 | 107,79 | 103,94 |
| JWH-210-5-OH-Pentyl | 97,82 | 91,67 | 80,46 | 79,96 | 74,11 | 50,46 | 104,23 | 94,21 | 87,19 | 98,14 | 84,07 | 72,92 | 88,22 | 86,38 | 61,34 | 103,43 | 94,54 | 88,06 |
| JWH-210-5-OH-indol | 83,15 | 81,83 | 79,12 | 89,80 | 64,04 | 49,57 | 91,51 | 89,73 | 84,76 | 80,37 | 74,27 | 70,63 | 86,68 | 79,70 | 40,27 | 98,38 | 92,54 | 83,38 |
| JWH-210-N-4OHP | 105,14 | 78,51 | 74,84 | 124,89 | 116,38 | 76,22 | 109,52 | 85,40 | 81,51 | 108,71 | 80,59 | 69,53 | 110,83 | 103,75 | 77,14 | 113,56 | 93,16 | 86,83 |
| JWH-250 | 107,48 | 101,50 | 73,13 | 78,00 | 64,55 | 64,02 | 85,78 | 81,21 | 76,27 | 62,74 | 58,28 | 49,82 | 49,67 | 45,94 | 37,44 | 85,81 | 78,14 | 67,44 |
| JWH-250-4-OH-Pentyl | 99,49 | 96,00 | 93,81 | 111,04 | 95,27 | 66,78 | 102,60 | 92,03 | 87,88 | 109,92 | 104,39 | 89,04 | 87,43 | 77,88 | 61,16 | 108,01 | 91,01 | 88,75 |
| JWH-250-5-OHP | 102,86 | 96,31 | 83,68 | 117,48 | 108,41 | 63,24 | 103,19 | 102,52 | 98,86 | 113,97 | 110,17 | 87,11 | 110,46 | 96,22 | 66,26 | 104,02 | 95,55 | 92,57 |
| MBDB.HCl | 98,73 | 89,69 | 74,77 | 121,40 | 80,30 | 71,82 | 107,23 | 100,04 | 96,78 | 99,85 | 75,38 | 71,55 | 116,75 | 110,66 | 76,63 | 98,69 | 92,88 | 85,11 |
| RCS-4 | 95,82 | 75,71 | 53,38 | 134,79 | 114,62 | 44,26 | 95,83 | 83,03 | 66,27 | 81,38 | 69,66 | 50,66 | 69,96 | 40,06 | 36,05 | 89,50 | 68,47 | 55,30 |
| RCS-4-5-0H-Pentyl | 82,98 | 70,08 | 57,13 | 81,46 | 62,77 | 55,74 | 107,92 | 72,16 | 57,61 | 54,05 | 32,86 | 55,77 | 46,39 | 34,20 | 21,55 | 68,36 | 54,86 | 54,33 |
| RCS-4-N-5-Carboxypentyl | 91,89 | 40,43 | 39,08 | 113,96 | 31,74 | 11,95 | 115,05 | 62,77 | 60,12 | 68,23 | 30,53 | 7,75 | 63,71 | 32,46 | 10,83 | 75,03 | 58,40 | 53,71 |
| UR-144-N-5-OH-Pentyl | 85,45 | 32,71 | 15,40 | 69,19 | 29,46 | 9,63 | 96,75 | 60,09 | 32,66 | 81,44 | 27,94 | 15,23 | 138,42 | 32,31 | 5,84 | 83,63 | 48,83 | 46,66 |
| UR-144-NPA | 92,20 | 58,68 | 52,87 | 76,38 | 55,37 | 24,72 | 100,02 | 76,52 | 69,92 | 67,20 | 50,20 | 16,94 | 53,48 | 49,58 | 9,16 | 106,66 | 61,39 | 56,48 |
| WIN-55212-2 | 103,04 | 93,77 | 76,29 | 106,93 | 101,39 | 61,79 | 103,00 | 90,32 | 84,32 | 89,54 | 77,37 | 61,41 | 75,51 | 68,02 | 60,67 | 98,28 | 95,18 | 73,03 |
| XLR-11-6OH-indol | 109,90 | 79,33 | 58,37 | 117,78 | 64,65 | 44,21 | 102,11 | 87,59 | 65,88 | 128,33 | 68,01 | 57,11 | 90,72 | 51,69 | 31,99 | 102,47 | 71,07 | 57,56 |
| XLR-11-N-4-OHP | 73,97 | 60,05 | 55,44 | 69,03 | 46,48 | 44,15 | 94,88 | 54,20 | 73,48 | 71,40 | 64,51 | 57,54 | 73,24 | 61,91 | 33,64 | 94,24 | 63,51 | 60,17 |
| 1,4 ethylmetcathinone | 98,27 | 83,12 | 67,90 | 133,59 | 73,13 | 69,04 | 109,08 | 97,82 | 96,35 | 116,66 | 79,13 | 73,01 | 118,77 | 67,19 | 65,27 | 101,16 | 87,22 | 77,09 |
| Mephedrone | 92,85 | 88,11 | 83,80 | 75,48 | 76,44 | 68,43 | 99,75 | 93,22 | 86,85 | 90,77 | 95,36 | 84,05 | 73,18 | 72,70 | 62,81 | 94,04 | 105,07 | 109,24 |
| Alpha-PVP | 84,08 | 80,21 | 78,57 | 134,77 | 98,95 | 70,31 | 104,15 | 101,80 | 93,07 | 87,05 | 83,16 | 82,13 | 88,98 | 87,45 | 72,14 | 107,91 | 98,33 | 87,54 |
| Buphedrone | 94,97 | 90,28 | 81,61 | 113,09 | 85,35 | 77,35 | 105,03 | 100,75 | 95,16 | 104,30 | 97,98 | 94,00 | 102,13 | 105,37 | 73,07 | 94,35 | 91,14 | 84,21 |
| Bupropion | 117,61 | 91,18 | 82,85 | 124,51 | 73,46 | 70,57 | 99,89 | 95,59 | 86,69 | 108,41 | 90,91 | 85,79 | 82,42 | 80,81 | 79,69 | 95,32 | 94,90 | 90,53 |
| Methedrone | 100,33 | 90,23 | 91,77 | 118,50 | 86,14 | 86,05 | 104,36 | 98,03 | 92,48 | 108,51 | 100,36 | 99,46 | 108,51 | 93,25 | 75,65 | 83,73 | 80,59 | 76,28 |
|  | Excess stability value (>125%) | | | | | | | | | | | | | | |  |  |  |
|  | High stability (>80%) | | | | | | | | | | |  |  |  |  |  |  |  |
|  | Medium stability (40-80%) | | | | | | | | | | |  |  |  |  |  |  |  |
|  | Low stability (<40%) | | | | | | | | | | |  |  |  |  |  |  |  |
